# Supplementary material for: Small non-coding RNA profiling and the role of piRNA pathway genes in the protection of chicken primordial germ cells
Source: PubMed Central journal article supplement (PMC4286946; doi:10.1186/1471-2164-15-757), 2014-09-04
Supplement: 12864_2014_6778_MOESM1_ESM.pdf [file 12864_2014_6778_MOESM1_ESM.pdf]

Table S1. The statistics of sequencing quality.

| Sample  | Raw data              |                      | Sequencing quality   |                      |                      |
|---------|-----------------------|----------------------|----------------------|----------------------|----------------------|
|         | Number of total reads | Total base pairs (%) | >Q10 base pairs (%)  | >Q20 base pairs (%)  | >Q30 base pairs (%)  |
| PGCs    | 9175177               | 449583673<br>(100%)  | 446499729<br>(99.3%) | 443029508<br>(98.5%) | 437364277<br>(97.3%) |
| Stage X | 9243725               | 452942525<br>(100%)  | 449308999<br>(99.2%) | 445330516<br>(98.3%) | 437482641<br>(96.6%) |
| GSCs    | 10314115              | 505391635<br>(100%)  | 501960419<br>(99.3%) | 497913287<br>(98.5%) | 491262999<br>(97.2%) |
| CEFs    | 16705966              | 818592334<br>(100%)  | 814478919<br>(99.5%) | 809925849<br>(98.9%) | 792138467<br>(96.8%) |
