# Supplementary material for: Small non-coding RNA profiling and the role of piRNA pathway genes in the protection of chicken primordial germ cells
Source: PubMed Central journal article supplement (PMC4286946; doi:10.1186/1471-2164-15-757), 2014-09-04
Supplement: 12864_2014_6778_MOESM3_ESM.pdf [file 12864_2014_6778_MOESM3_ESM.pdf]

Table S2. piRNAPredictor output and distribution of piRNAs from next-generation sequencing.

| Samples | Input                  | Output                  | Distribution of piRNAs |             |              |                  |            |                |       |      |       |      |
|---------|------------------------|-------------------------|------------------------|-------------|--------------|------------------|------------|----------------|-------|------|-------|------|
|         | Number of unique reads | Number of unique piRNAs | Repeat                 | Unannotated | Intron sense | Intron antisense | Exon sense | Exon antisense | snRNA | rRNA | miRNA | tRNA |
| PGCs    | 687544                 | 197237                  | 104898                 | 68096       | 4380         | 1542             | 15218      | 329            | 170   | 1599 | 64    | 397  |
| Stage X | 350113                 | 53890                   | 14820                  | 25529       | 3126         | 366              | 7297       | 83             | 78    | 1629 | 51    | 504  |
| GSCs    | 350647                 | 57311                   | 7742                   | 32008       | 3355         | 331              | 11133      | 62             | 114   | 1631 | 64    | 301  |
| CEFs    | 159803                 | 9931                    | 293                    | 5816        | 766          | 133              | 1441       | 16             | 26    | 777  | 78    | 289  |
