# Supplementary material for: Small non-coding RNA profiling and the role of piRNA pathway genes in the protection of chicken primordial germ cells
Source: PubMed Central journal article supplement (PMC4286946; doi:10.1186/1471-2164-15-757), 2014-09-04
Supplement: 12864_2014_6778_MOESM4_ESM.pdf [file 12864_2014_6778_MOESM4_ESM.pdf]

Table S3. Comparison of proTRAC and piRNApredictor outputs.

| Samples | Input  | Common<br>Output | Distribution of common piRNAs |                               |        |             |        |           |       |           |       |      |       |      |
|---------|--------|------------------|-------------------------------|-------------------------------|--------|-------------|--------|-----------|-------|-----------|-------|------|-------|------|
|         |        |                  | Number<br>of unique<br>reads  | Number<br>of unique<br>piRNAs | Repeat | Unannotated | Intron |           | Exon  |           | snRNA | rRNA | miRNA | tRNA |
|         |        |                  |                               |                               |        |             | sense  | antisense | sense | antisense |       |      |       |      |
| PGCs    | 687544 | 35538            | 28520                         | 5845                          | 633    | 259         | 213    | 46        | 20    | 1         | 1     | 0    |       |      |
| Stage X | 350113 | 4097             | 3695                          | 301                           | 65     | 31          | 4      | 0         | 0     | 1         | 0     | 0    |       |      |
| GSCs    | 350647 | 1795             | 1162                          | 562                           | 38     | 23          | 8      | 0         | 1     | 0         | 1     | 0    |       |      |
| CEFs    | 159803 | 27               | 1                             | 19                            | 3      | 0           | 4      | 0         | 0     | 0         | 0     | 0    |       |      |
