# Supplementary material for: Small non-coding RNA profiling and the role of piRNA pathway genes in the protection of chicken primordial germ cells
Source: PubMed Central journal article supplement (PMC4286946; doi:10.1186/1471-2164-15-757), 2014-09-04
Supplement: 12864_2014_6778_MOESM8_ESM.pdf [file 12864_2014_6778_MOESM8_ESM.pdf]

Table S5. The survival rate of PGCs purified by MACS.

| Trials | Number of embryos used | Total number of cells isolated from embryonic gonads | Number of cells after MACS <sup>1</sup> | Viability (%) <sup>2</sup> |
|--------|------------------------|------------------------------------------------------|-----------------------------------------|----------------------------|
| T1     | 554                    | 6.3 x 10 <sup>7</sup>                                | 593000                                  | 97                         |
| T2     | 577                    | 7.3 x 10 <sup>7</sup>                                | 689000                                  | 98                         |
| T3     | 586                    | 8.7 x 10 <sup>7</sup>                                | 813000                                  | 96                         |
| T4     | 326                    | 3.1 x 10 <sup>7</sup>                                | 299000                                  | 97                         |

<sup>1</sup>Number of SSEA1-positive cells after MACS

<sup>2</sup>Percentage of live cells by trypan blue staining
