# Supplementary material for: Small non-coding RNA profiling and the role of piRNA pathway genes in the protection of chicken primordial germ cells
Source: PubMed Central journal article supplement (PMC4286946; doi:10.1186/1471-2164-15-757), 2014-09-04
Supplement: 12864_2014_6778_MOESM9_ESM.pdf [file 12864_2014_6778_MOESM9_ESM.pdf]

Table S6. qPCR primers used for the amplification of piRNAs.

| Seq. ID     | Primer Sequences (5'-3')     | Seq. ID     | *Primer Sequences (5'-3')   |
|-------------|------------------------------|-------------|-----------------------------|
| ISG_3439104 | F: TATTCCTAACGTCCAGCCTG      | ISG_1952422 | F: AGAACACACTTGGCCTTCC      |
| ISG_1920655 | F: ACTGAACACAGCACTCGAGGT     | ISG_2943457 | F: AGAGCTGCCCCTGAGCCT       |
| ISG_1259042 | F: GAAGATGTGCACCTGACGC       | ISG_2785619 | F: GCATGTTGCTCTCTGTCAGC     |
| ISG_2022559 | F: GTTTACTGACTGAGCTACTTTTCCC | ISG_2633063 | F: GGTACTGAGACATCTTGGAGACAA |
| ISG_1354003 | F: TCCAAGGACCAGTAGCGCT       | ISG_2087909 | F: CTCAAAGGATTCCGCATCG      |
| ISG_3065006 | F: CCAAATGGTAGCAGAGGCC       | ISG_3356981 | F: GCTGAGAACTAAGGATGCCTCC   |
| ISG_3294350 | F: TGTGACCCTGGAATTCCACTAC    | ISG_2645108 | F: GTGAGAAGGGCTTTGTGCAG     |
| ISG_2675670 | F: GTGTGGGACGAGAAGGAGAAC     | ISG_3080707 | F: GTGTGTGAGTGCGGCGG        |
| ISG_3280151 | F: AAGGACCTCTGAGAATTGCTTTCT  | ISG_1621199 | F: AAGAGAAGCTGAACACAGGGTG   |
| snoRNA      | F: GGGATGTAAAAAATACTTGCTATC  |             |                             |

\*F: Forward primers. Universal reverse primer was purchased from Agilent Technologies.
