# Supplementary material for: Small non-coding RNA profiling and the role of piRNA pathway genes in the protection of chicken primordial germ cells
Source: PubMed Central journal article supplement (PMC4286946; doi:10.1186/1471-2164-15-757), 2014-09-04
Supplement: 12864_2014_6778_MOESM10_ESM.pdf [file 12864_2014_6778_MOESM10_ESM.pdf]

Table S7. qPCR primers used for the amplification of genes.

| Gene<br>Symbol  | Description                                                                    | GenBank<br>Accession no. | Forward Primer (5'-3')  | Reverse Primer (5'-3')   |
|-----------------|--------------------------------------------------------------------------------|--------------------------|-------------------------|--------------------------|
| <i>CRI</i>      | Retrotransposon CR1                                                            | U88211                   | AAACTCCATGGGCAAAGATGGTG | GGCTCTCGACCTGTTTCCTGACTG |
| <i>CHIR-B5</i>  | Immunoglobulin-like receptor CHIR-B5                                           | NM_001146136             | GAGCATGTGGAGATGGGGAG    | AAAGAGGGTGAAGGTGGCAG     |
| <i>CHIR-AB1</i> | Immunoglobulin-like receptor CHIR-AB1                                          | NM_001146141             | GACACGGAGAGATGAGAGCG    | TAGATGACAGGGGACTGGGG     |
| <i>PLLP</i>     | Plasmolipin                                                                    | NM_001030561             | GCAGCTCCCCATGAAGTTCT    | CAGCGGCTCTCCTGTTGTAA     |
| <i>MYO1A</i>    | Myosin IA                                                                      | NM_205163                | TGCTGATGATGCGTATCGCT    | CACTTTGTCCACCTCCTCCC     |
| <i>SLC6A2</i>   | Solute carrier family 6 (neurotransmitter transporter, noradrenalin), member 2 | NM_204716                | AGTACACCAGCAGCAACCTC    | CAGAGGTAGGGGAACCTCCA     |
| <i>17.5</i>     | Lectin-like protein, type II transmembrane protein (17.5)                      | NM_205429                | AGCTGAGACAGAACAGGTGC    | GGAAACCGATTGAGGCGTTG     |
| <i>RAP2B</i>    | RAP2B, member of RAS oncogene family                                           | NM_001030702             | ACGGACAGACGGACGGACAG    | CGGCACCCAAGAAGACCAAG     |
| <i>LRP8</i>     | Low density lipoprotein receptor-related protein 8, apolipoprotein e receptor  | NM_205186                | GGCTGGGTCCTGACATGAAA    | TTCCGATACAGCTCTGGGGA     |
| <i>VDR</i>      | Vitamin D (1,25- dihydroxyvitamin D3) receptor                                 | NM_205098                | AGTCAGCGATGTCACCCAAG    | GATCTGGGGACAGGATGCAG     |
| <i>MYH1E</i>    | Myosin, heavy chain 1E, skeletal muscle                                        | NM_001013397             | GCCCTGGATGAAGCTGTTCT    | CTCCTCCAGCTCCTTCCTCT     |
| <i>ZNF302</i>   | Zinc finger protein 302;                                                       | NM_001030695             | GAGCAGCTGTGTCTCAGAGG    | GCTGCTTTTGAGCTGTGCTT     |
| <i>RGN</i>      | Regucalcin                                                                     | NM_204729                | CTTCCTGCTGCTTTGGAGGA    | CACACCAAGCCCAGTGATCT     |

|               |                                                                 |              |                         |                         |
|---------------|-----------------------------------------------------------------|--------------|-------------------------|-------------------------|
| <i>FOXD2</i>  | Forkhead box D2                                                 | NM_204952    | GACATGTTCGACAACGGCAG    | GCCGTAGTTGTAGCCGTAGG    |
| <i>RASSF2</i> | Ras association (RalGDS/AF-6) domain<br>family member 2         | NM_001030884 | CTGTGAGCAGGTCTCCAAGG    | CTTCTTGACTTCGCGGTCCT    |
| <i>VAMP7</i>  | Vesicle-associated membrane protein 7                           | NM_001031121 | AAGAGCACAGACAGCCCTTC    | CTACCTGGTCAGTGCCCTTG    |
| <i>CIWI</i>   | Chicken PIWI (P-element-induced wimpy<br>testis)-like protein 1 | NM_001098852 | CCGAAATGGAGAAGATGTGAGGA | TGTGATTAGGGATGCTGACTGGG |
| <i>CILI</i>   | Chicken PIWI (P-element-induced wimpy<br>testis)-like protein 2 | JN248386     | GCTCCGTCATCGGCTTCGT     | TTCTTGGGCAGGCAGTGGTT    |
| <i>GAPDH</i>  | Glyceraldehyde-3-phosphate<br>dehydrogenase                     | NM_204305    | CCTCTCTGGCAAAGTCCAAG    | CATCTGCCCATTTGATGTTG    |

---
